# Supplementary material for: Aqueous RAFT polymerization-induced self-assembly (PISA): amphiphilic macroRAFT self-assembly vs. monomer droplet nucleation (miniemulsion polymerization)
Source: Royal Society of Chemistry journal article supplement (doi:10.1039/d2py01425d), 2023-01-01
Supplement: d2py01425d1.pdf [file d2py01425d1.pdf]

## Supporting Information

### **Aqueous RAFT Polymerization-Induced Self-Assembly (PISA): Amphiphilic MacroRAFT Self-Assembly vs Monomer Droplet Nucleation (Miniemulsion Polymerization)**

Hyun Jin Kim, Fumi Ishizuka, Shunsuke Chatani, Hiroshi Niino, Per B. Zetterlund\*

*H.J. Kim, Dr. F. Ishizuka, Prof. P.B. Zetterlund*

*Cluster for Advanced Macromolecular Design (CAMD), School of Chemical Engineering, The  
University of New South Wales, Sydney, NSW, 2052, Australia*

*E-mail: p.zetterlund@unsw.edu.au*

*Dr. S. Chatani, Dr. H. Niino*

*Hiroshima R&D Center, Mitsubishi Chemical Corporation, 20-1 Miyuki-cho, Otake,  
Hiroshima 739-0693, Japan.*

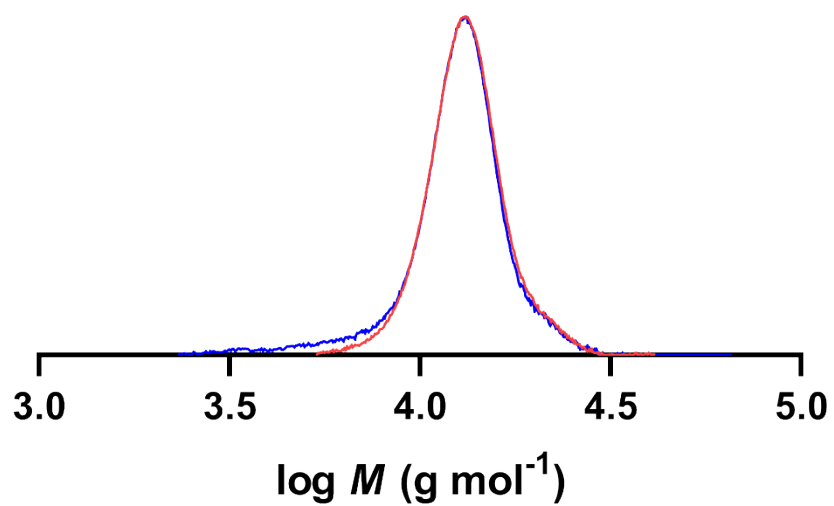

**Figure S1.** Molecular weight distributions ( $w(\log M)$  vs.  $\log M$ ) of P(AA-*stat*-PEGA)-TTC macroRAFT agent,  $[\text{AA}]_0/[\text{PEGA}]_0 = 50/50$  (Table S1; Blue = M1, Red = M2).

**Table S1.** Synthesis of P(AA-*stat*-PEGA)-TTC macroRAFT agents via solution polymerization in the presence of BTPA at 80 °C, and RAFT aqueous emulsion polymerization of styrene using P(AA-*stat*-PEGA)-TTC macroRAFT agent at 80 °C for 6 h; 20 wt% solids, molar ratio AA/PEGA = 50/50, [styrene]<sub>0</sub>/[macroRAFT]<sub>0</sub> = 250, [macroRAFT]<sub>0</sub>/[initiator]<sub>0</sub> = 5.

**Synthesis of macroRAFT agent**

| Entry | [M]/[RAFT] | <i>t</i><br>[h] | Conv. <sup>a)</sup><br>[%] | <i>M</i> <sub>n,th</sub> <sup>b)</sup><br>[g mol <sup>-1</sup> ] | <i>M</i> <sub>n</sub> <sup>c)</sup><br>[g mol <sup>-1</sup> ] | <i>D</i> <sup>d)</sup> |
|-------|------------|-----------------|----------------------------|------------------------------------------------------------------|---------------------------------------------------------------|------------------------|
| M1    | 44/1       | 3               | 96                         | 11,800                                                           | 12,200                                                        | 1.09                   |
| M2    | 44/1       | 3               | 98                         | 12,100                                                           | 13,000                                                        | 1.06                   |

**Synthesis of P(AA-*stat*-PEGA)-*b*-PSt nanoparticles**

| Entry | MacroRAFT | Conv. <sup>e)</sup><br>[%] | <i>t</i><br>[h] | <i>M</i> <sub>n,th</sub> <sup>f)</sup><br>[g mol <sup>-1</sup> ] | <i>M</i> <sub>n</sub> <sup>c)</sup><br>[g mol <sup>-1</sup> ] | <i>D</i> <sup>d)</sup> | Morphology <sup>g)</sup> |
|-------|-----------|----------------------------|-----------------|------------------------------------------------------------------|---------------------------------------------------------------|------------------------|--------------------------|
| A-1   | M1        | 87                         | 6               | 34,800                                                           | 40,600                                                        | 1.31                   | S+ W +V                  |
| A-2   | M1        | 87                         | 5               | 34,800                                                           | 38,200                                                        | 1.77                   | S+ W +V                  |
| B-1   | M2        | 92                         | 1.7             | 36,200                                                           | 39,200                                                        | 1.37                   | S + W                    |
| B-2   | M1        | 92                         | 1.7             | 36,300                                                           | 37,600                                                        | 1.37                   | S + W                    |
| B-3   | M1        | 92                         | 2               | 36,200                                                           | 38,600                                                        | 1.51                   | S + W                    |
| C-1   | M2        | 93                         | 1.7             | 36,300                                                           | 36,800                                                        | 1.55                   | S + W                    |
| C-2   | M2        | 89                         | 1.7             | 35,300                                                           | 37,300                                                        | 1.33                   | S                        |

<sup>a)</sup>Monomer conversion determined by <sup>1</sup>H NMR; <sup>b)</sup>Theoretical *M*<sub>n,th</sub> calculated using monomer conversion obtained from <sup>1</sup>H NMR via equation (1); <sup>c)</sup>Experimental *M*<sub>n</sub> determined by GPC in DMAc; <sup>d)</sup>Dispersity index (*M*<sub>w</sub>/*M*<sub>n</sub>) determined by GPC in DMAc; <sup>e)</sup>Monomer conversion determined by gravimetry; <sup>f)</sup>Theoretical *M*<sub>n,th</sub> calculated using monomer conversion obtained from gravimetry via equation (2); <sup>g)</sup>Nanoparticle morphologies determined by SEM imaging, where S = spheres, W = worms, V = vesicles.

**Table S2.** DLS analyses of nanoparticles synthesized via RAFT aqueous emulsion polymerization using P(AA-*stat*-PEGA)-TTC macroRAFT agent at 80 °C for 6 h; 20 wt% solids, molar ratio AA/PEGA = 50/50,  $[\text{styrene}]_0/[\text{macroRAFT}]_0 = 250$ ,  $[\text{macroRAFT}]_0/[\text{initiator}]_0 = 5$ .

| Entry | SDS <sup>a)</sup><br>[wt%] | HD <sup>a)</sup><br>[wt%] | Droplet <sup>b)</sup><br>$d_z$ [nm] | Droplet<br>PDI | Particle <sup>b)</sup><br>$d_z$ [nm] | Particle<br>PDI |
|-------|----------------------------|---------------------------|-------------------------------------|----------------|--------------------------------------|-----------------|
| A-1   | –                          | –                         | –                                   | –              | 537                                  | 0.88            |
| A-2   | –                          | –                         | 532                                 | 0.54           | 668                                  | 0.37            |
| B-1   | 5                          | –                         | –                                   | –              | 610                                  | 0.70            |
| B-2   | 5                          | –                         | 646                                 | 0.54           | 190                                  | 0.34            |
| B-3   | 5                          | –                         | 538                                 | 0.19           | 310                                  | 0.95            |
| C-1   | 5                          | –                         | 965                                 | 0.18           | 184                                  | 0.50            |
| C-2   | 5                          | 5                         | 243                                 | 0.24           | 109                                  | 0.08            |

<sup>a)</sup>wt% relative to styrene; <sup>b)</sup> $d_z$  = z-average diameter.

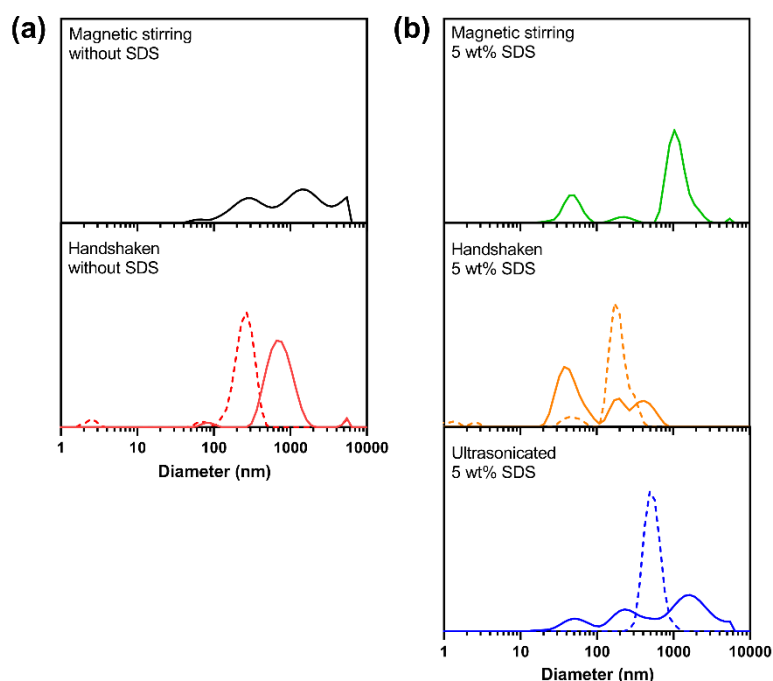

**Figure S2.** Droplet sized distributions (dotted lines; before polymerization) and particle size distributions (full lines; after polymerization at 80 °C for 6 h) for aqueous heterogeneous RAFT polymerization of styrene (a) without SDS and (b) with 5 wt% SDS (rel. to styrene) (Entries A-x, B-x; **Table S2**).

**Table S3.** RAFT aqueous emulsion polymerization of styrene using P(AA-*stat*-PEGA)-TTC macroRAFT agent without SDS at 80 °C for 6 h; 20 wt% solids, molar ratio AA/PEGA = 50/50,  $[\text{styrene}]_0/[\text{macroRAFT}]_0 = 250$ ,  $[\text{macroRAFT}]_0/[\text{ACPA}]_0 = 5$ .

| Entry | Method <sup>a)</sup> | $t$<br>[min] | Conv. <sup>b)</sup><br>[%] | $M_{n,\text{th}}$ <sup>c)</sup><br>[g mol <sup>-1</sup> ] | $M_n$ <sup>d)</sup><br>[g mol <sup>-1</sup> ] | $\mathcal{D}$ <sup>e)</sup> |
|-------|----------------------|--------------|----------------------------|-----------------------------------------------------------|-----------------------------------------------|-----------------------------|
| A-1   | –                    | 80           | 9                          | 14,600                                                    | 14,700                                        | 1.11                        |
|       |                      | 100          | 15                         | 16,100                                                    | 15,500                                        | 1.12                        |
|       |                      | 120          | 69                         | 30,300                                                    | 32,400                                        | 1.27                        |
|       |                      | 360          | 87                         | 34,800                                                    | 40,600                                        | 1.31                        |
| A-2   | H                    | 150          | 3                          | 13,000                                                    | 15,100                                        | 1.08                        |
|       |                      | 180          | 15                         | 16,200                                                    | 20,200                                        | 1.21                        |
|       |                      | 210          | 51                         | 25,500                                                    | 32,300                                        | 1.50                        |
|       |                      | 240          | 69                         | 30,100                                                    | 35,400                                        | 1.68                        |
|       |                      | 300          | 87                         | 34,800                                                    | 38,200                                        | 1.77                        |

<sup>a)</sup>H denotes handshaken; <sup>b)</sup>Monomer conversion determined by gravimetry; <sup>c)</sup>Theoretical  $M_{n,\text{th}}$  calculated using monomer conversion obtained from gravimetry via equation (2); <sup>d)</sup>Experimental  $M_n$  determined by GPC in DMAc; <sup>e)</sup>Dispersity index ( $M_w/M_n$ ) determined by GPC in DMAc.

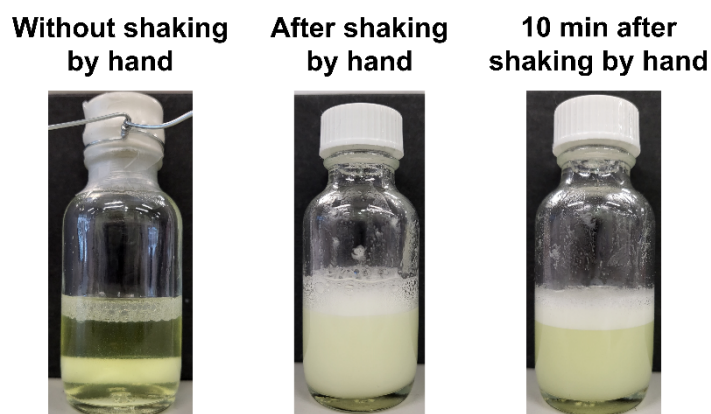

**Figure S3.** Images of solution without shaking by hand and shaking by hand before polymerization without SDS.

**Table S4.** RAFT aqueous emulsion polymerization of styrene using P(AA-*stat*-PEGA)-TTC macroRAFT agent with 5 wt% SDS (rel. to styrene) at 80 °C for 6 h; 20 wt% solids, molar ratio AA/PEGA = 50/50,  $[\text{styrene}]_0/[\text{macroRAFT}]_0 = 250$ ,  $[\text{macroRAFT}]_0/[\text{ACPA}]_0 = 5$ .

| Entry | Method <sup>a)</sup> | $t$<br>[min] | Conv. <sup>b)</sup><br>[%] | $M_{n,\text{th}}^{\text{c)}$<br>[g mol <sup>-1</sup> ] | $M_n^{\text{d)}$<br>[g mol <sup>-1</sup> ] | $\mathcal{D}^{\text{e)}$ |
|-------|----------------------|--------------|----------------------------|--------------------------------------------------------|--------------------------------------------|--------------------------|
| B-1   | –                    | 20           | 0.6                        | 12,300                                                 | 15,300                                     | 1.10                     |
|       |                      | 40           | 3.2                        | 13,000                                                 | 14,800                                     | 1.10                     |
|       |                      | 60           | 53.1                       | 36,000                                                 | 28,100                                     | 1.36                     |
|       |                      | 80           | 88.2                       | 35,100                                                 | 37,600                                     | 1.36                     |
|       |                      | 100          | 92.3                       | 36,200                                                 | 39,200                                     | 1.37                     |
| B-2   | H                    | 20           | 0.8                        | 12,500                                                 | 15,000                                     | 1.10                     |
|       |                      | 40           | 20.5                       | 17,600                                                 | 20,000                                     | 1.19                     |
|       |                      | 60           | 86.4                       | 34,700                                                 | 38,700                                     | 1.39                     |
|       |                      | 80           | 90.8                       | 35,900                                                 | 38,300                                     | 1.38                     |
|       |                      | 100          | 92.3                       | 36,300                                                 | 37,600                                     | 1.37                     |
| B-3   | U                    | 60           | 1.4                        | 12,600                                                 | 14,600                                     | 1.09                     |
|       |                      | 80           | 14.6                       | 16,100                                                 | 17,100                                     | 1.19                     |
|       |                      | 100          | 63.3                       | 28,700                                                 | 33,200                                     | 1.41                     |
|       |                      | 120          | 87.2                       | 34,900                                                 | 37,400                                     | 1.51                     |
|       |                      | 150          | 92.0                       | 36,200                                                 | 38,600                                     | 1.51                     |

<sup>a)</sup>H denotes handshaken and U denotes ultrasonicated; <sup>b)</sup>Monomer conversion determined by gravimetry; <sup>c)</sup>Theoretical  $M_{n,\text{th}}$  calculated using monomer conversion obtained from gravimetry via equation (2); <sup>d)</sup>Experimental  $M_n$  determined by GPC in DMAc; <sup>e)</sup>Dispersity index ( $M_w/M_n$ ) determined by GPC in DMAc.

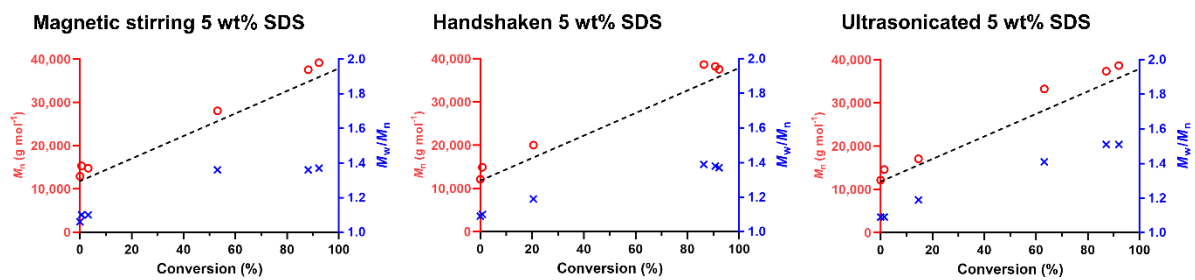

**Figure S4.** Evolution in number-average molecular weight ( $M_n$ , red circles) and dispersity ( $M_w/M_n$ , blue crosses) with conversion. Dashed line indicates theoretical  $M_n$  (Table S4).

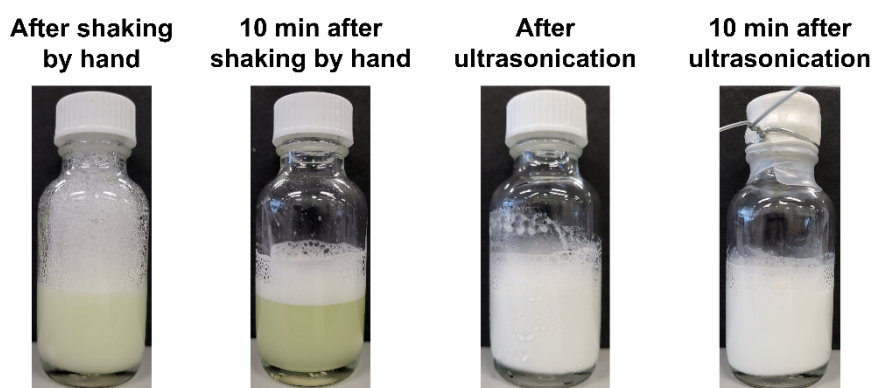

**Figure S5.** Images of solution handshaken and ultrasonicated before polymerization with 5 wt% SDS (rel. to styrene).

**Table S5.** RAFT aqueous emulsion polymerization of styrene using P(AA-*stat*-PEGA)-TTC macroRAFT agent with 5 wt% SDS (rel. to styrene) at 80 °C for 6 h; 20 wt% solids, molar ratio AA/PEGA = 50/50,  $[\text{styrene}]_0/[\text{macroRAFT}]_0 = 250$ ,  $[\text{macroRAFT}]_0/[\text{AIBN}]_0 = 5$ .

| Entry | Method <sup>a)</sup> | HD <sup>b)</sup> | $t$   | Conv. <sup>c)</sup> | $M_{n,\text{th}}^{\text{d)}$ | $M_n^{\text{e)}$       | $\mathcal{D}^{\text{f)}$ |
|-------|----------------------|------------------|-------|---------------------|------------------------------|------------------------|--------------------------|
|       |                      | [wt%]            | [min] | [%]                 | [g mol <sup>-1</sup> ]       | [g mol <sup>-1</sup> ] |                          |
| C-1   | U                    | –                | 20    | 2.1                 | 12,700                       | 14,400                 | 1.11                     |
|       |                      |                  | 40    | 14.3                | 15,900                       | 16,900                 | 1.15                     |
|       |                      |                  | 60    | 82.2                | 33,500                       | 35,100                 | 1.55                     |
|       |                      |                  | 80    | 91.6                | 36,000                       | 36,100                 | 1.62                     |
|       |                      |                  | 100   | 92.9                | 36,300                       | 36,800                 | 1.55                     |
| C-2   | U                    | 5                | 40    | 34.4                | 21,100                       | 24,100                 | 1.24                     |
|       |                      |                  | 60    | 73.9                | 31,400                       | 35,100                 | 1.30                     |
|       |                      |                  | 80    | 84.8                | 34,200                       | 36,400                 | 1.32                     |
|       |                      |                  | 100   | 89.0                | 35,300                       | 37,300                 | 1.33                     |

<sup>a)</sup>U denotes ultrasonicated; <sup>b)</sup>wt% relative to styrene; <sup>c)</sup>Monomer conversion determined by gravimetry; <sup>d)</sup>Theoretical  $M_{n,\text{th}}$  calculated using monomer conversion obtained from gravimetry via equation (2); <sup>e)</sup>Experimental  $M_n$  determined by GPC in DMAc; <sup>f)</sup>Dispersity index ( $M_w/M_n$ ) determined by GPC in DMAc.



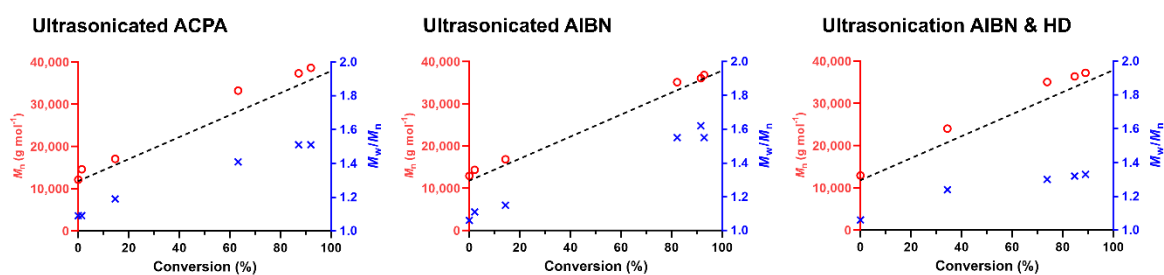

**Figure S6.** Evolution in number-average molecular weight ( $M_n$ , red circles) and dispersity ( $M_w/M_n$ , blue crosses) with conversion. Dashed line indicates theoretical  $M_n$  (Table S5).

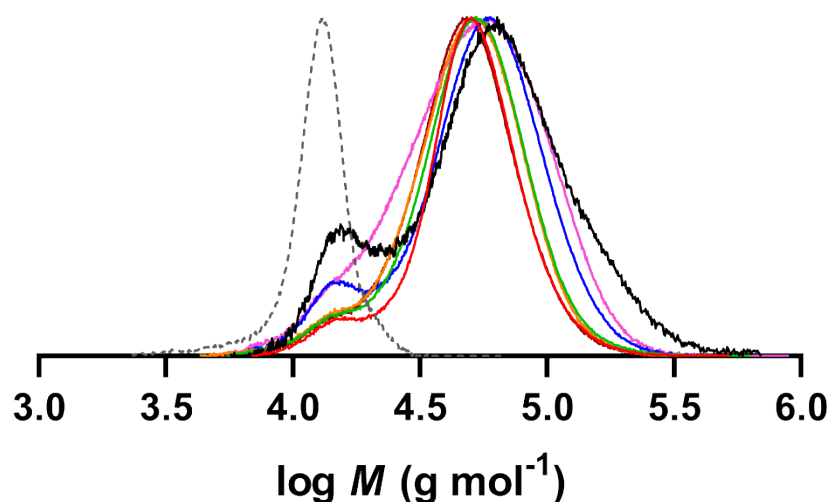

**Figure S7.** Molecular weight distributions ( $w(\log M)$  vs.  $\log M$ ) of aqueous heterogeneous RAFT polymerization of styrene at high conversion (Table S1; dotted line = P(AA-*stat*-PEGA)-TTC macroRAFT agent (M1), red = magnetic stirring without SDS (A-1; conv. = 87%), black = handshaken without SDS (A-2; Conv. = 87%), green = magnetic stirring 5 wt% SDS (B-1; conv. = 92%), orange = handshaken 5 wt% SDS (B-2; conv. = 92%), blue = ultrasonicated 5 wt% SDS (B-3; conv. = 92%), pink = ultrasonicated AIBN (C-1; conv. = 93%), and brown = ultrasonicated AIBN/HD (C-2; conv. = 89%).

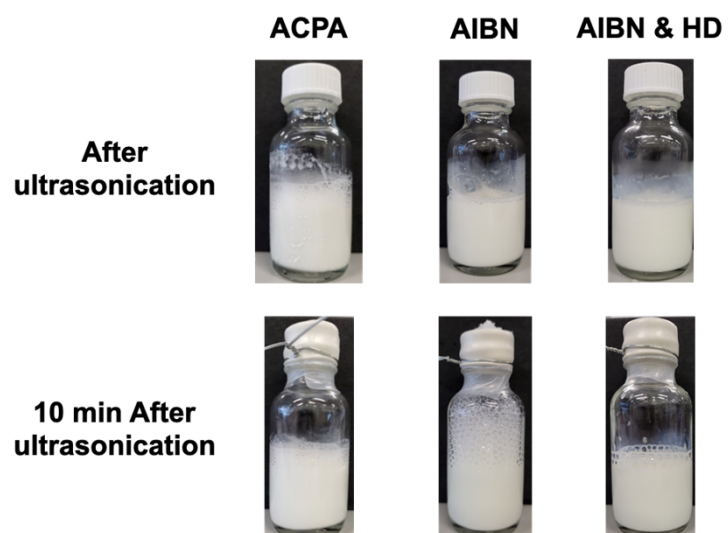

**Figure S8.** Images of solution ultrasonicated before polymerization with ACPA, AIBN, and AIBN/HD in the presence of 5 wt% SDS (rel. to styrene).
